# Supplementary material for: Proteomic and bioinformatic analysis of epithelial tight junction reveals an unexpected cluster of synaptic molecules
Source: PubMed Central journal article supplement (PMC1712231; doi:10.1186/1745-6150-1-37), 2006-12-08
Supplement: 1745-6150-1-37-S2.pdf [file 1745-6150-1-37-S2.pdf]

## TIGHT JUNCTION PROTEOMICS HITS

|                            |                                                                                                                                                                                                                                                                                                                                                                                                                                                                                                                                                                                                                                                                                                                                                                                                                                                                                                                                                                                                                                                                                                                                                                                                                                                                                                                                                                                                                                                                                                                                                                                                                                                                                                                                                                                                                                                                                                                                                                                                                                                                                                                                                                                                                                                                                                                                                                                                                                                                                                                                                                                                                                                                                                                                                                                                                                                                                                                                                                                                                                            |
|----------------------------|--------------------------------------------------------------------------------------------------------------------------------------------------------------------------------------------------------------------------------------------------------------------------------------------------------------------------------------------------------------------------------------------------------------------------------------------------------------------------------------------------------------------------------------------------------------------------------------------------------------------------------------------------------------------------------------------------------------------------------------------------------------------------------------------------------------------------------------------------------------------------------------------------------------------------------------------------------------------------------------------------------------------------------------------------------------------------------------------------------------------------------------------------------------------------------------------------------------------------------------------------------------------------------------------------------------------------------------------------------------------------------------------------------------------------------------------------------------------------------------------------------------------------------------------------------------------------------------------------------------------------------------------------------------------------------------------------------------------------------------------------------------------------------------------------------------------------------------------------------------------------------------------------------------------------------------------------------------------------------------------------------------------------------------------------------------------------------------------------------------------------------------------------------------------------------------------------------------------------------------------------------------------------------------------------------------------------------------------------------------------------------------------------------------------------------------------------------------------------------------------------------------------------------------------------------------------------------------------------------------------------------------------------------------------------------------------------------------------------------------------------------------------------------------------------------------------------------------------------------------------------------------------------------------------------------------------------------------------------------------------------------------------------------------------|
| <b>Protein Name</b>        | Voltage-gated P/Q-type calcium channel alpha-1A subunit                                                                                                                                                                                                                                                                                                                                                                                                                                                                                                                                                                                                                                                                                                                                                                                                                                                                                                                                                                                                                                                                                                                                                                                                                                                                                                                                                                                                                                                                                                                                                                                                                                                                                                                                                                                                                                                                                                                                                                                                                                                                                                                                                                                                                                                                                                                                                                                                                                                                                                                                                                                                                                                                                                                                                                                                                                                                                                                                                                                    |
| <b>Alternative Name</b>    | Voltage-dependent calcium channel alpha subunit Cav2.1, Calcium channel L type, Alpha-1 polypeptide                                                                                                                                                                                                                                                                                                                                                                                                                                                                                                                                                                                                                                                                                                                                                                                                                                                                                                                                                                                                                                                                                                                                                                                                                                                                                                                                                                                                                                                                                                                                                                                                                                                                                                                                                                                                                                                                                                                                                                                                                                                                                                                                                                                                                                                                                                                                                                                                                                                                                                                                                                                                                                                                                                                                                                                                                                                                                                                                        |
| <b>Accession Number</b>    | O00555                                                                                                                                                                                                                                                                                                                                                                                                                                                                                                                                                                                                                                                                                                                                                                                                                                                                                                                                                                                                                                                                                                                                                                                                                                                                                                                                                                                                                                                                                                                                                                                                                                                                                                                                                                                                                                                                                                                                                                                                                                                                                                                                                                                                                                                                                                                                                                                                                                                                                                                                                                                                                                                                                                                                                                                                                                                                                                                                                                                                                                     |
| <b>Family</b>              | Calcium channel alpha-1 subunit                                                                                                                                                                                                                                                                                                                                                                                                                                                                                                                                                                                                                                                                                                                                                                                                                                                                                                                                                                                                                                                                                                                                                                                                                                                                                                                                                                                                                                                                                                                                                                                                                                                                                                                                                                                                                                                                                                                                                                                                                                                                                                                                                                                                                                                                                                                                                                                                                                                                                                                                                                                                                                                                                                                                                                                                                                                                                                                                                                                                            |
| <b>Domains</b>             |                                                                                                                                                                                                                                                                                                                                                                                                                                                                                                                                                                                                                                                                                                                                                                                                                                                                                                                                                                                                                                                                                                                                                                                                                                                                                                                                                                                                                                                                                                                                                                                                                                                                                                                                                                                                                                                                                                                                                                                                                                                                                                                                                                                                                                                                                                                                                                                                                                                                                                                                                                                                                                                                                                                                                                                                                                                                                                                                                                                                                                            |
| <b>Binding Partner</b>     |                                                                                                                                                                                                                                                                                                                                                                                                                                                                                                                                                                                                                                                                                                                                                                                                                                                                                                                                                                                                                                                                                                                                                                                                                                                                                                                                                                                                                                                                                                                                                                                                                                                                                                                                                                                                                                                                                                                                                                                                                                                                                                                                                                                                                                                                                                                                                                                                                                                                                                                                                                                                                                                                                                                                                                                                                                                                                                                                                                                                                                            |
| <b>Configuration</b>       | Integral Membrane                                                                                                                                                                                                                                                                                                                                                                                                                                                                                                                                                                                                                                                                                                                                                                                                                                                                                                                                                                                                                                                                                                                                                                                                                                                                                                                                                                                                                                                                                                                                                                                                                                                                                                                                                                                                                                                                                                                                                                                                                                                                                                                                                                                                                                                                                                                                                                                                                                                                                                                                                                                                                                                                                                                                                                                                                                                                                                                                                                                                                          |
| <b>Modulation</b>          | <input type="checkbox"/> Lipid <input type="checkbox"/> P <input type="checkbox"/> Acetyl <input type="checkbox"/> Ned <input type="checkbox"/> Methyl <input type="checkbox"/> ADP-R<br><input type="checkbox"/> Sugar <input type="checkbox"/> U <input type="checkbox"/> Arg <input type="checkbox"/> SUMO <input type="checkbox"/> Sulfate                                                                                                                                                                                                                                                                                                                                                                                                                                                                                                                                                                                                                                                                                                                                                                                                                                                                                                                                                                                                                                                                                                                                                                                                                                                                                                                                                                                                                                                                                                                                                                                                                                                                                                                                                                                                                                                                                                                                                                                                                                                                                                                                                                                                                                                                                                                                                                                                                                                                                                                                                                                                                                                                                             |
| <b>Regulation</b>          | <input type="checkbox"/> PI's <input type="checkbox"/> mRNA Level <input type="checkbox"/> IRES <input type="checkbox"/> GTP <input type="checkbox"/> ATP <input type="checkbox"/> Splicing<br><input type="checkbox"/> Ca <input type="checkbox"/> RNA Editing <input type="checkbox"/> PKC <input type="checkbox"/> AMP <input type="checkbox"/> cAMP <input type="checkbox"/> Calpain                                                                                                                                                                                                                                                                                                                                                                                                                                                                                                                                                                                                                                                                                                                                                                                                                                                                                                                                                                                                                                                                                                                                                                                                                                                                                                                                                                                                                                                                                                                                                                                                                                                                                                                                                                                                                                                                                                                                                                                                                                                                                                                                                                                                                                                                                                                                                                                                                                                                                                                                                                                                                                                   |
| <b>Localization</b>        | <input type="checkbox"/> Tight Junction <input type="checkbox"/> Endosome <input type="checkbox"/> IF Cytoskeleton <input type="checkbox"/> Ectosome <input type="checkbox"/> Centrosome<br><input type="checkbox"/> Plasma Membrane <input checked="" type="checkbox"/> Synapse <input type="checkbox"/> Ribosome <input type="checkbox"/> Hnrnp <input type="checkbox"/> Nuclear<br><input type="checkbox"/> Golgi/Golgi-driven <input type="checkbox"/> Synaptic Vesicle <input type="checkbox"/> Proteasome <input type="checkbox"/> PARPs <input type="checkbox"/> Cilia<br><input type="checkbox"/> Actin Cytoskeleton <input type="checkbox"/> Neurite <input type="checkbox"/> Extracellular <input type="checkbox"/> Cytosolic <input type="checkbox"/> Mitochondria<br><input type="checkbox"/> Intracellular Membrane <input type="checkbox"/> ER/ER-derived <input type="checkbox"/> Exosome <input type="checkbox"/> Microtubule <input type="checkbox"/> Unknown                                                                                                                                                                                                                                                                                                                                                                                                                                                                                                                                                                                                                                                                                                                                                                                                                                                                                                                                                                                                                                                                                                                                                                                                                                                                                                                                                                                                                                                                                                                                                                                                                                                                                                                                                                                                                                                                                                                                                                                                                                                             |
| <b>Molecular Function</b>  | <input type="checkbox"/> Structural <input type="checkbox"/> Adaptor <input type="checkbox"/> GTPase <input type="checkbox"/> Kinase <input type="checkbox"/> Translation Machinery<br><input type="checkbox"/> Receptor <input type="checkbox"/> Catalyst <input type="checkbox"/> GEF/GAP <input type="checkbox"/> Phosphatase <input type="checkbox"/> IRES-Machinery<br><input type="checkbox"/> Messenger <input type="checkbox"/> Modifier <input type="checkbox"/> Peptidase <input type="checkbox"/> Helicase <input type="checkbox"/> Memb Fusion/Fission<br><input type="checkbox"/> Transducer <input type="checkbox"/> Chaperone <input type="checkbox"/> Antiprotease <input type="checkbox"/> Ribosomal <input type="checkbox"/> Unknown<br><input type="checkbox"/> Modulator <input checked="" type="checkbox"/> Channel <input type="checkbox"/> Transporter <input type="checkbox"/> Splicing Factor<br><input type="checkbox"/> Organizer <input type="checkbox"/> ATPase <input type="checkbox"/> Motor <input type="checkbox"/> Transcription Factor                                                                                                                                                                                                                                                                                                                                                                                                                                                                                                                                                                                                                                                                                                                                                                                                                                                                                                                                                                                                                                                                                                                                                                                                                                                                                                                                                                                                                                                                                                                                                                                                                                                                                                                                                                                                                                                                                                                                                                  |
| <b>Cellular Function</b>   | <input type="checkbox"/> Signalling <input type="checkbox"/> mRNA Stability <input type="checkbox"/> Mitosis <input type="checkbox"/> Translation <input type="checkbox"/> Gene Silencing<br><input type="checkbox"/> Cell-Cell <input type="checkbox"/> Cytoskeleton <input type="checkbox"/> Cytokinesis <input type="checkbox"/> IRES-Translation <input type="checkbox"/> RNA Silencing<br><input type="checkbox"/> Adhesion <input type="checkbox"/> Cell Migration <input type="checkbox"/> Transcription <input type="checkbox"/> Protein Processing <input type="checkbox"/> RNA Editing<br><input type="checkbox"/> Endocytosis <input type="checkbox"/> Cell Protrusion <input type="checkbox"/> RNA Processing <input type="checkbox"/> Protein Degradation <input type="checkbox"/> Unknown<br><input checked="" type="checkbox"/> Exocytosis <input type="checkbox"/> Cell Death <input type="checkbox"/> Viral/Bacterial <input type="checkbox"/> Energy/Metabolism <input type="checkbox"/> Other...<br><input checked="" type="checkbox"/> Synaptic <input type="checkbox"/> Pro-Apoptotic <input type="checkbox"/> DNA Replication <input type="checkbox"/> Cell Homeostasis<br><input type="checkbox"/> Vesicular Traffic <input type="checkbox"/> Anti-Apoptotic <input type="checkbox"/> DNA Repair <input type="checkbox"/> Membrane Potential<br><input type="checkbox"/> mRNA Targeting <input type="checkbox"/> Cell Growth <input type="checkbox"/> Biosynthesis <input type="checkbox"/> Stress Response<br><input type="checkbox"/> mRNA Turnover <input type="checkbox"/> Cell Cycle <input type="checkbox"/> Biodegradation <input type="checkbox"/> Damage Control                                                                                                                                                                                                                                                                                                                                                                                                                                                                                                                                                                                                                                                                                                                                                                                                                                                                                                                                                                                                                                                                                                                                                                                                                                                                                                                                           |
| <b>Signaling Pathway</b>   | <input type="checkbox"/> 14-3-3's <input type="checkbox"/> PLC <input type="checkbox"/> PKCd <input type="checkbox"/> Rab6 <input type="checkbox"/> TGFb <input type="checkbox"/> Formin <input type="checkbox"/> KSR1 <input type="checkbox"/> ACH<br><input type="checkbox"/> 14-3-3b <input type="checkbox"/> PLCb <input type="checkbox"/> PKCep <input type="checkbox"/> Rab27 <input type="checkbox"/> TNFa <input type="checkbox"/> Calpain <input type="checkbox"/> Myc <input type="checkbox"/> GABA<br><input type="checkbox"/> 14-3-3e <input type="checkbox"/> PLD <input type="checkbox"/> PKCz <input type="checkbox"/> Rho <input type="checkbox"/> IL's <input type="checkbox"/> COP9 <input type="checkbox"/> Dab1 <input type="checkbox"/> Glycine<br><input type="checkbox"/> 14-3-3n <input type="checkbox"/> PI3K <input type="checkbox"/> Ras <input type="checkbox"/> Rac <input type="checkbox"/> Cytokine <input type="checkbox"/> Shc <input type="checkbox"/> PDK1 <input type="checkbox"/> Glutamate<br><input type="checkbox"/> 14-3-3g <input type="checkbox"/> Erk <input type="checkbox"/> Raf <input type="checkbox"/> Cdc42 <input type="checkbox"/> STAT1/2 <input type="checkbox"/> Abl <input type="checkbox"/> WT1 <input type="checkbox"/> SCAR/WAVE<br><input type="checkbox"/> 14-3-3t <input type="checkbox"/> NO <input type="checkbox"/> A-Raf <input type="checkbox"/> PDGF <input type="checkbox"/> Insulin <input type="checkbox"/> Tec <input type="checkbox"/> LKB1 <input type="checkbox"/> Notch/Deltex<br><input type="checkbox"/> 14-3-3z <input type="checkbox"/> cAMP <input type="checkbox"/> B-Raf <input type="checkbox"/> VEGF <input type="checkbox"/> AMPK <input type="checkbox"/> ARF6 <input type="checkbox"/> HSP90 <input type="checkbox"/> Semaphorin<br><input checked="" type="checkbox"/> Calcium <input type="checkbox"/> AMP <input type="checkbox"/> Rap1 <input type="checkbox"/> FGF <input type="checkbox"/> Serpin <input type="checkbox"/> SHH <input type="checkbox"/> Phox <input type="checkbox"/> Caspase8<br><input type="checkbox"/> G Protein <input type="checkbox"/> ATP <input type="checkbox"/> Rap2 <input type="checkbox"/> HGF <input type="checkbox"/> p53/Myc <input type="checkbox"/> DbI <input type="checkbox"/> Nck <input type="checkbox"/> p53<br><input type="checkbox"/> Gαq <input type="checkbox"/> PKA <input type="checkbox"/> Rab <input type="checkbox"/> EGF <input type="checkbox"/> Wnt/Frz <input type="checkbox"/> ApoB <input type="checkbox"/> NFkB <input type="checkbox"/> LIMK<br><input type="checkbox"/> PI's <input type="checkbox"/> PKB <input type="checkbox"/> Rab3 <input type="checkbox"/> IFNg <input type="checkbox"/> GRP78 <input type="checkbox"/> PP2A <input type="checkbox"/> JNK<br><input type="checkbox"/> PLA <input type="checkbox"/> PKC <input type="checkbox"/> Rab5 <input type="checkbox"/> IFNa <input type="checkbox"/> LFA-1 <input type="checkbox"/> ATM <input type="checkbox"/> 5HT |
| <b>Specialized Process</b> | <input type="checkbox"/> Metastasis <input type="checkbox"/> Myelination <input type="checkbox"/> RNA Polymerase II <input type="checkbox"/> Synaptogenesis<br><input type="checkbox"/> Glycolysis <input type="checkbox"/> Inflammation <input type="checkbox"/> Lf-Rt Asymmetry <input type="checkbox"/> Synaptic Plasticity<br><input checked="" type="checkbox"/> Secretion <input checked="" type="checkbox"/> Communication <input type="checkbox"/> Membrane Rheology <input type="checkbox"/> Synaptic Translation<br><input type="checkbox"/> Cell Fate <input type="checkbox"/> Differentiation <input type="checkbox"/> Cerebral Cortex Size <input checked="" type="checkbox"/> Neurotransmitter Release<br><input type="checkbox"/> G1/S <input type="checkbox"/> Morphogenesis <input type="checkbox"/> Tumor Suppression <input type="checkbox"/> Neurotransmitter Synthesis<br><input type="checkbox"/> G2/M <input type="checkbox"/> Nutrient Uptake <input type="checkbox"/> Actin Polymerization <input type="checkbox"/> Glucose-Regulated Response<br><input type="checkbox"/> Polarity <input type="checkbox"/> Memory/Learning <input type="checkbox"/> Leukocyte Migration <input type="checkbox"/> Oxygen-Regulated Response<br><input type="checkbox"/> TJ Barrier <input type="checkbox"/> Wound Healing <input type="checkbox"/> Paracrine Signalling <input type="checkbox"/> Glutathione Homeostasis<br><input type="checkbox"/> TJ Formation <input type="checkbox"/> Respiratory Burst <input type="checkbox"/> Insulin Release <input type="checkbox"/> Asymmetric Cell Division<br><input type="checkbox"/> Defense/Immune <input type="checkbox"/> H2O2 Production <input type="checkbox"/> Axon Guidance <input type="checkbox"/> Organogenesis<br><input type="checkbox"/> Stemness <input type="checkbox"/> Iron Homeostasis <input type="checkbox"/> Neurite Outgrowth                                                                                                                                                                                                                                                                                                                                                                                                                                                                                                                                                                                                                                                                                                                                                                                                                                                                                                                                                                                                                                                                                                                              |
| <b>Multifactor Disease</b> | <input type="checkbox"/> Cancer <input type="checkbox"/> CMT <input checked="" type="checkbox"/> Epilepsy <input type="checkbox"/> Alzheimer's <input type="checkbox"/> Schizophrenia <input type="checkbox"/> Polycystic Kidney<br><input type="checkbox"/> Diabetes <input checked="" type="checkbox"/> Ataxia <input type="checkbox"/> Deafness <input type="checkbox"/> Huntington's <input type="checkbox"/> Bowel Diseases                                                                                                                                                                                                                                                                                                                                                                                                                                                                                                                                                                                                                                                                                                                                                                                                                                                                                                                                                                                                                                                                                                                                                                                                                                                                                                                                                                                                                                                                                                                                                                                                                                                                                                                                                                                                                                                                                                                                                                                                                                                                                                                                                                                                                                                                                                                                                                                                                                                                                                                                                                                                           |
| <b>Disease</b>             | Familial hemiplegic migraine (FHM), Autosomal dominant spinocerebellar ataxia type 6 (SCA6), Episodic ataxia type-2 (EA-2, acetazolamide-responsive hereditary paroxysmal cerebellar ataxia APCA)                                                                                                                                                                                                                                                                                                                                                                                                                                                                                                                                                                                                                                                                                                                                                                                                                                                                                                                                                                                                                                                                                                                                                                                                                                                                                                                                                                                                                                                                                                                                                                                                                                                                                                                                                                                                                                                                                                                                                                                                                                                                                                                                                                                                                                                                                                                                                                                                                                                                                                                                                                                                                                                                                                                                                                                                                                          |
