# Supplementary material for: Proteomic and bioinformatic analysis of epithelial tight junction reveals an unexpected cluster of synaptic molecules
Source: PubMed Central journal article supplement (PMC1712231; doi:10.1186/1745-6150-1-37), 2006-12-08
Supplement: 1745-6150-1-37-S3.pdf [file 1745-6150-1-37-S3.pdf]

**A**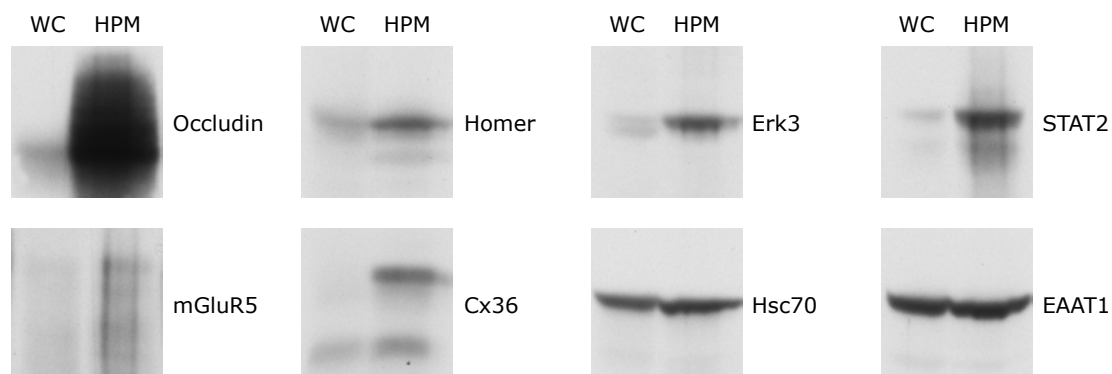**B**

| Protein           | AB ID#   | Antibodies        | Specificity       | Antigen                    | Concentration for staining | Concentration for blotting |
|-------------------|----------|-------------------|-------------------|----------------------------|----------------------------|----------------------------|
| Connexin 36       | Sc-14904 | Goat polyclonal   | Affinity purified | Human C-terminus peptide   | 10 ug/ml                   | 1 ug/ml                    |
| CP alpha 1A       | Sc-28619 | Rabbit polyclonal | IgG fraction      | Human C-terminus 2225-2314 | 10 ug/ml                   | Not Done                   |
| EAAT1             | Sc-15316 | Rabbit polyclonal | IgG fraction      | Human N-terminus 1-50      | 10 ug/ml                   | 1 ug/ml                    |
| Erk3              | Sc-156   | Rabbit polyclonal | Affinity purified | Rat internal peptide       | 10 ug/ml                   | 1 ug/ml                    |
| GluR-1            | Sc-13152 | Mouse monoclonal  | IgG(1)            | Human N-terminus peptide   | 10 ug/ml                   | 1 ug/ml                    |
| GRIP1             | Sc-28934 | Rabbit polyclonal | IgG fraction      | Rat C-terminus 910-1100    | 10 ug/ml                   | 1 ug/ml                    |
| Homer             | Sc-15321 | Rabbit polyclonal | IgG fraction      | Human Homer-1b 13-354      | 10 ug/ml                   | 1 ug/ml                    |
| Hsc70             | Sc-7298  | Mouse monoclonal  | IgG(2a)           | Human C-terminus peptide   | 10 ug/ml                   | 1 ug/ml                    |
| Kv2.1             | Ab5186   | Rabbit polyclonal | IgG fraction      | Rat C-terminus peptide     | 10 ug/ml                   | Not Done                   |
| mGluR1            | G7794    | Rabbit polyclonal | IgG fraction      | Rat C-terminus peptide     | 10 ug/ml                   | Not Done                   |
| mGluR5            | Ab27190  | Rabbit polyclonal | Affinity purified | Human C-terminus peptide   | 10 ug/ml                   | 1 ug/ml                    |
| Occludin          | 33-1500  | Mouse monoclonal  | IgG fraction      | Human C-terminus 100 aa    | 10 ug/ml                   | 1 ug/ml                    |
| NMDZ zeta 1       | Sc-1467  | Goat polyclonal   | Affinity purified | Human C-terminus peptide   | 10 ug/ml                   | Not Done                   |
| PKC zeta          | Sc-216   | Rabbit polyclonal | Affinity purified | Rat C-terminus peptide     | 10 ug/ml                   | 1 ug/ml                    |
| Piccolo           | Sc-18569 | Goat polyclonal   | Affinity purified | Human C-terminus peptide   | 10 ug/ml                   | Not Done                   |
| Rabaptin-5        | Sc-6162  | Goat polyclonal   | Affinity purified | Human C-terminus peptide   | 10 ug/ml                   | Not Done                   |
| Synaptotagmin VII | Sc-15420 | Goat polyclonal   | Affinity purified | Human C-terminus peptide   | 10 ug/ml                   | 1 ug/ml                    |
| Stat2             | Sc-476   | Rabbit polyclonal | Affinity purified | Human C-terminus peptide   | 10 ug/ml                   | 1 ug/ml                    |
